# Supplementary material for: Fabricating Dispersed Fine Silver Nanoparticles on Liquid Substrate for Improved Photocatalytic Water Splitting Efficiency
Source: MDPI journal article supplement (doi:10.3390/catal13060946), 2023-05-28
Supplement: s1 [file s1]

Archive with 1 entries (1 files):
- catalysts-2395458-supplementary.pdf
