# Supplementary material for: Fabricating Dispersed Fine Silver Nanoparticles on Liquid Substrate for Improved Photocatalytic Water Splitting Efficiency
Source: MDPI journal article supplement (doi:10.3390/catal13060946), 2023-05-28
Supplement: s1 [file s1 › catalysts-2395458-supplementary.pdf]

Fabricating dispersed fine silver nanoparticles on liquid substrate for improved photocatalytic water splitting efficiency

### Supplemental materials

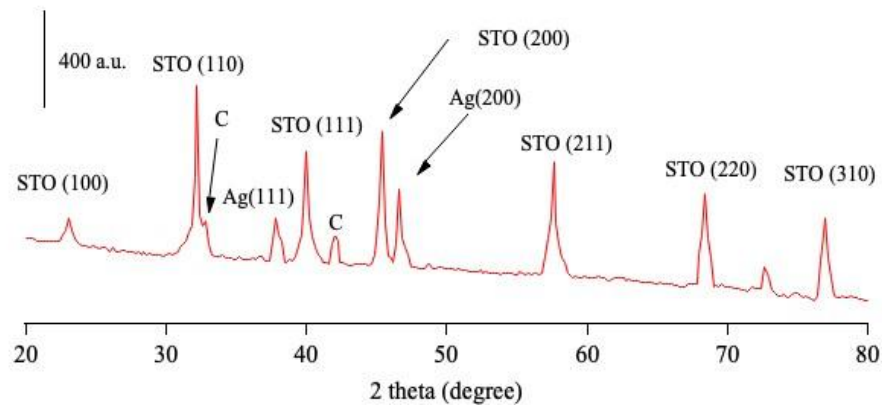

Figure S1. XRD spectrum for Ag NP/STO. JCPDS card numbers for STO (00-040-1500) and Ag NPS (00-004-0783).

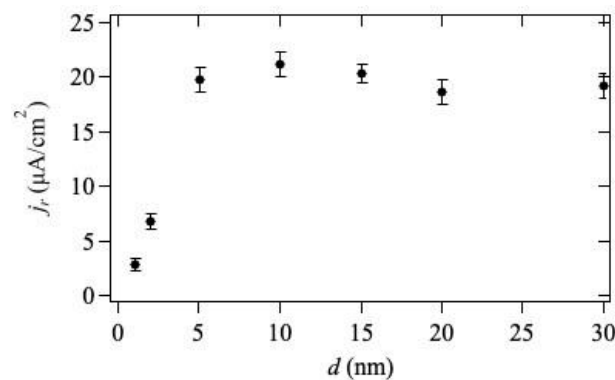

Figure S2. The relative current density ( $j_r$ ) varies with deposition nominal film thickness ( $d$ ). Deposition flux  $f = 0.001$  nm/s and substrate temperature  $T = 293$  K.
